## Clinical Reports

BURNELL R. BROWN, JR., M.D., PH.D., *Editor*

Anesthesiology  
51:452-453, 1979

### Pulmonary Aspiration Syndrome after Inhalation of Gastric Fluid Containing Antacids

VIRGINIA K. BOND, M.D.,\* ROBERT K. STOELTING, M.D.,† C. D. GUPTA, M.B.‡

Oral administration of antacids to increase gastric-fluid pH of pregnant patients at term has gained wide acceptance. It is assumed that aspiration of gastric contents will be less likely to produce chemical pneumonitis when the gastric-fluid pH has been elevated by prior administration of antacids. This report describes pulmonary edema and impaired oxygenation in a patient treated with antacids who aspirated gastric fluid with a pH of 6.4 during anesthetic induction for cesarean section.

#### REPORT OF A CASE

A 31-year-old, 78-kg woman, gravida 3, para 1, abortus 1, was admitted at term in early labor. The prenatal course had been uncomplicated, and there was no history of cardiac or pulmonary disease. A lumbar epidural catheter was inserted and analgesia provided with 0.25 per cent bupivacaine. Labor did not progress, and the analgesia was allowed to dissipate. Thirteen hours following admission it was decided to proceed with cesarean section. Reinsertion of the epidural catheter did not produce sensory loss, and preparations for general endotracheal anesthesia were initiated. An antacid, Riopan® (magnesium and aluminum hydroxide as a single molecule, 80 mg/ml), 15 ml, had been administered orally every two hours during labor (total 90 ml), with the last dose an hour prior to anesthetic induction.

Anesthetic induction (1150) was achieved with thiamylal, 250 mg, and succinylcholine, 80 mg, preceded by preoxygenation and metocurine, 2 mg. Cricoid pressure was started shortly after thiamylal administration. Fasciculations did not occur. On initiation of direct laryngoscopy the pharynx was found to contain green fluid. An estimated 50 ml of this fluid were suctioned from the pharynx before the glottic opening could be visualized for tracheal intubation. Aspiration through the tracheal tube yielded a "small amount" of similar fluid. An oral gastric tube was placed and 300 ml of green fluid were obtained. The pH values of the pharyngeal and gastric aspirates, determined separately (Corning pH meter and Beckman

pH electrode), were 6.4. Ventilation was controlled with 60 per cent nitrous oxide in oxygen until delivery of a male infant (1- and 5-min Apgar scores 7 and 9) at 1210. The first blood-gas analysis, at 1215, revealed  $P_{aO_2}$  115 torr,  $P_{aCO_2}$  36 torr, and pH 7.40 during controlled ventilation with 50 per cent nitrous oxide in oxygen. Wheezing and decreased compliance were seen at 1300, and pink frothy fluid appeared in the endotracheal tube at 1330 as the surgical procedure was completed. Positive end-expiratory pressure (PEEP, 5 cm  $H_2O$ ) was applied and a subsequent blood-gas analysis during breathing of 100 per cent oxygen revealed a large A-a $D_{O_2}$  (table 1). At this point, intraoperative fluids consisted of lactated Ringer's solution, 550 ml. Blood pressure and heart rate remained near awake levels throughout the operation. Urinary output since the beginning of the operation was 50 ml.

Arterial oxygenation remained impaired, necessitating controlled ventilation via the tracheal tube with high oxygen concentrations and 5-10 cm  $H_2O$  PEEP for the following 72 hours (table 1). The patient's trachea was extubated on the fourth postoperative day, and satisfactory oxygenation was maintained with supplemental oxygen via nasal prongs. Roentgenograms of the chest initially showed bilateral pulmonary infiltrates, which cleared gradually over the following seven days (table 1). Analysis of the gastric aspirate revealed a magnesium concentration of 40 mEq/l.

#### DISCUSSION

Inhalation of 0.3-0.4 ml/kg gastric fluid with a pH below 2.5 is considered likely to produce acid pneumonitis in man.<sup>1</sup> Nevertheless, this critical volume and pH remain unproven. The pH value of 2.5 has been questioned in a case report describing pulmonary aspiration syndrome following aspiration of gastric fluid with a pH of 3.5.<sup>2</sup> In the present case, pulmonary edema and impaired oxygenation occurred following aspiration of an undetermined volume of gastric fluid of pH 6.4.

Aspiration is considered acid when pH is less than 2.5 and "nonacid" or neutral when pH is more than 2.5.<sup>3</sup> Nonacid aspiration can cause either transient or sustained pulmonary damage. The nature and extent of this damage depend not only on the volume aspirated but also the composition of the aspirate, especially its tonicity and the presence of large particles or food material. The presence of digestive enzymes or

\* Assistant Professor of Anesthesia and Director of Obstetrical Anesthesia.

† Professor and Chairman.

‡ Anesthesia Resident II.

Received from the Department of Anesthesia, Indiana University School of Medicine, Indianapolis, Indiana 46223. Accepted for publication December 17, 1978.

Address reprint requests to Dr. Stoelting.

TABLE 1. Summary of Clinical Data

| Time                 | PaO <sub>2</sub><br>(torr) | PaCO <sub>2</sub><br>(torr) | pH   | F <sub>IO<sub>2</sub></sub> | PEEP<br>(cm H <sub>2</sub> O) | Radiographic Findings                                                                                     |
|----------------------|----------------------------|-----------------------------|------|-----------------------------|-------------------------------|-----------------------------------------------------------------------------------------------------------|
| 1215                 | 115                        | 36                          | 7.40 | .5                          | 0                             | Bilateral pulmonary infiltrates consistent with aspiration or pulmonary edema                             |
| 1340                 | 63                         | 34                          | 7.38 | 1.0                         | 5                             |                                                                                                           |
| 1500                 | 53                         | 43                          | 7.34 | 1.0                         | 10                            |                                                                                                           |
| 1900                 | 80                         | 41                          | 7.33 | .9                          | 10                            |                                                                                                           |
| Postoperative day 1  | 64                         | 32                          | 7.40 | .5                          | 10                            | Bilateral pulmonary infiltrates unchanged; appearance consistent with adult respiratory distress syndrome |
| Postoperative day 2  | 53                         | 36                          | 7.48 | .6                          | 5                             |                                                                                                           |
| Postoperative day 4  | 68                         | 38                          | 7.47 | Nasal oxygen                | 0                             | Patchy bilateral pulmonary infiltrates                                                                    |
| Postoperative day 7  |                            |                             |      |                             |                               | Decreased extent of patchy bilateral pulmonary infiltrates                                                |
| Postoperative day 14 | 79                         | 39                          | 7.48 | .21                         | 0                             | Pleural thickening; bilateral pulmonary infiltrates no longer visible                                     |

bile in the aspirate is of limited importance in the development of aspiration pneumonitis.<sup>3</sup> The actual volume aspirated by our patient could not be accurately determined, but food particles were not present. However, the aspirate did contain the antacid, as confirmed by the presence of 40 mEq/l magnesium. The effect of this magnesium on the tonicity of the gastric aspirate and subsequent pulmonary effects as manifested by pulmonary edema and impaired oxygenation cannot be determined. In addition, the direct effects of this or other commercially available antacid preparations on the tracheobronchial tree remain unknown.

Pulmonary aspiration is a recognized hazard in pregnant patients, and the logic of prophylactic antacid therapy to increase gastric-fluid pH is widely accepted. Recent reports also advocate antacid administration to nonpregnant patients considered to be at risk from pulmonary aspiration.<sup>4</sup> However, the efficacy of this prophylaxis, the potential harmful effects of antacids on tonicity of inhaled fluid, and possible adverse effects of antacids directly on the tracheobronchial tree remain unknown. We do not believe this case report should deter the use of antacids for

high-risk patients. However, the use of glycopyrrolate<sup>5</sup> and/or a histamine H<sub>2</sub>-receptor antagonist such as cimetidine<sup>6</sup> to increase gastric-fluid pH should also be considered in management of high-risk patients. These drugs, particularly cimetidine, might effectively neutralize gastric-fluid pH without introducing potential harmful effects from aspiration of gastric fluid containing antacids.

#### REFERENCES

1. Roberts RB, Shirley MA: Reducing the risk of acid aspiration during cesarean section. *Anesth Analg* (Cleve) 53:859-868, 1974
2. Taylor G: Acid pulmonary aspiration syndrome after antacids. *Br J Anaesth* 47:615-617, 1975
3. Wynne JW, Modell JH: Respiratory aspiration of stomach contents. *Ann Intern Med* 87:466-474, 1977
4. White FA, Clark RB, Thompson DS: Preoperative oral antacid therapy for patients requiring emergency surgery. *South Med J* 71:177-179, 1978
5. Baraka A, Saab M, Salem MR, et al: Control of gastric acidity by glycopyrrolate premedication in the parturient. *Anesth Analg* (Cleve) 56:642-645, 1977
6. Stoelting RK: Gastric fluid pH in patients receiving cimetidine. *Anesth Analg* (Cleve) 57:675-677, 1978
